# Supplementary material for: High Circulating Methylated DNA Is a Negative Predictive and Prognostic Marker in Metastatic Colorectal Cancer Patients Treated With Regorafenib
Source: PubMed Central journal article supplement (PMC6640154; doi:10.3389/fonc.2019.00622), 2019-07-12
Supplement: Table_1.pdf [file Table_1.pdf]

**Supplementary Table:**

Summary of main adverse events in patients evaluable for toxicity (n=76), who received at least first cycle of regorafenib treatment.

The table shows also frequency, reason and timing of dose reductions.

| <b>Toxicities</b>                   | <b>G1-G2</b> | <b>G3-G4</b> |
|-------------------------------------|--------------|--------------|
|                                     | <i>n (%)</i> | <i>n (%)</i> |
| Hypertension                        | 11 (14%)     | 10 (13%)     |
| Skin rash                           | 10 (13%)     | 7 (9%)       |
| Hand-foot syndrome                  | 20 (26%)     | 15 (20%)     |
| Mucositis                           | 16 (21%)     | 4 (5%)       |
| Diarrhea                            | 8 (10%)      | 3 (4%)       |
| Bilirubin increase                  | 16 (21%)     | 1 (1%)       |
| AST/ALT increase                    | 13 (17%)     | 1 (1%)       |
| Thrombocytopenia                    | 8 (10%)      | 0            |
| Anemia                              | 7 (9%)       | 0            |
| Other toxicities                    | 37 (49%)     | 14 (18%)     |
| <b>Dose reduction</b>               | 41/74 (55%)  |              |
| <b>Dose reduction -1 dose level</b> | 29/41 (70%)  |              |
| <b>Dose reduction -2 dose level</b> | 12/41 (30%)  |              |
| <b>Reason for dose reduction</b>    |              |              |
| Hypertension                        | 1/41 (2%)    |              |
| Skin rash / HFS                     | 20/41 (49%)  |              |
| Mucositis                           | 2/41 (5%)    |              |
| Diarrhea                            | 2/41 (5%)    |              |
| Other                               | 16/41 (39%)  |              |
| <b>Dose reduction occurs</b>        |              |              |
| During first cycle                  | 18/41 (44%)  |              |
| At second cycle                     | 12/41 (29%)  |              |
| At third cycle                      | 5/41 (12%)   |              |
| After fourth cycle                  | 6/41 (15%)   |              |
| <b>Stop for toxicities</b>          | 10/76 (13%)  |              |
